# Supplementary material for: Socioeconomic status and self-reported, screen-detected and total diabetes prevalence in Chinese men and women in 2011-2012: a nationwide cross-sectional study
Source: PubMed Central journal article supplement (PMC6076585; doi:10.7189/jogh.08.020501), 2018-12
Supplement: jogh-08-020501-s001.pdf [file jogh-08-020501-s001.pdf]

## Online Supplementary Document

Wu et al. Socioeconomic status and self-reported, screen-detected and total diabetes prevalence in Chinese men and women in 2011-2012: a nationwide cross-sectional study

J Glob Health 2018;8:020501

**Table S1. Age-standardised\* prevalence and 95% CIs of diabetes by sex (n=10100)**

| Characteristics       | Men (n=4791) |                       |                         | Women (n=5309) |                       |                         |
|-----------------------|--------------|-----------------------|-------------------------|----------------|-----------------------|-------------------------|
|                       | n            | Diabetes (%)          |                         | n              | Diabetes (%)          |                         |
|                       |              | Self-reported (n=252) | Screen-detected (n=484) |                | Self-reported (n=353) | Screen-detected (n=503) |
| Age† (years)          |              |                       |                         |                |                       |                         |
| 45-54                 | 1492         | 4.7 (3.7-5.9)         | 9.5 (8.1-11.1)          | 1924           | 4.4 (3.6-5.4)         | 7.8 (6.7-9.1)           |
| 55-64                 | 1870         | 5.7 (4.8-6.9)         | 9.9 (8.7-11.4)          | 2023           | 8.2 (7.1-9.5)         | 9.8 (8.6-11.2)          |
| 65-74                 | 1032         | 5.1 (3.9-6.7)         | 10.1 (8.4-12.1)         | 936            | 8.7 (7.0-10.6)        | 10.6 (8.8-12.7)         |
| ≥75                   | 397          | 5.5 (3.7-8.2)         | 13.1 (10.1-16.8)        | 426            | 4.9 (3.2-7.4)         | 12.9 (10.1-16.4)        |
| Education             |              |                       |                         |                |                       |                         |
| Illiterate            | 658          | 2.8 (2.6-3.1)         | 8.0 (7.6-8.4)           | 2256           | 5.7 (5.4-6.1)         | 9.4 (8.9-9.8)           |
| Literate              | 926          | 6.0 (5.7-6.4)         | 10.3 (9.9-10.8)         | 942            | 6.4 (6.0-6.7)         | 10.0 (9.6-10.5)         |
| Elementary school     | 1291         | 5.0 (4.7-5.3)         | 8.9 (8.5-9.3)           | 932            | 7.2 (6.9-7.6)         | 10.9 (10.5-11.3)        |
| Middle school         | 1243         | 4.6 (4.3-4.9)         | 11.4 (11.0-11.9)        | 791            | 10.1 (9.7-10.6)       | 7.1 (6.7-7.5)           |
| High school and above | 673          | 9.1 (8.6-9.5)         | 10.2 (9.8-10.7)         | 388            | 11.1 (10.6-11.6)      | 11.8 (11.3-12.2)        |
| AHLE                  |              |                       |                         |                |                       |                         |
| Q1                    | 1179         | 3.1 (2.8-3.3)         | 9.7 (9.3-10.2)          | 1300           | 3.7 (3.4-4.0)         | 11.1 (10.6-11.6)        |
| Q2                    | 1201         | 4.5 (4.2-4.8)         | 9.1 (8.7-9.6)           | 1352           | 6.8 (6.5-7.2)         | 8.9 (8.5-9.3)           |

|                       |      |                 |                  |      |                  |                  |
|-----------------------|------|-----------------|------------------|------|------------------|------------------|
| Q3                    | 1204 | 6.4 (6.1-6.8)   | 10.9 (10.4-11.3) | 1324 | 7.8 (7.4-8.2)    | 9.7 (9.3-10.1)   |
| Q4                    | 1207 | 7.0 (6.6-7.4)   | 9.9 (9.5-10.3)   | 1333 | 8.7 (8.3-9.2)    | 9.1 (8.7-9.5)    |
| Residence             |      |                 |                  |      |                  |                  |
| Rural                 | 3134 | 3.9 (3.6-4.2)   | 10.0 (9.6-10.5)  | 3379 | 5.5 (5.1-5.8)    | 9.0 (8.6-9.4)    |
| Migrants              | 900  | 5.7 (5.3-6.0)   | 9.4 (9.0-9.8)    | 1108 | 6.8 (6.5-7.2)    | 11.3 (10.9-11.8) |
| Urban                 | 757  | 10.1 (9.6-10.5) | 11.1 (10.7-11.6) | 822  | 10.9 (10.5-11.4) | 9.2 (8.8-9.7)    |
| Geographical area     |      |                 |                  |      |                  |                  |
| West                  | 1679 | 4.1 (3.8-4.4)   | 11.4 (10.9-11.9) | 1774 | 4.6 (4.3-4.9)    | 10.9 (10.5-11.4) |
| Central and northeast | 1749 | 5.3 (5.0-5.6)   | 10.1 (9.6-10.5)  | 2017 | 7.2 (6.8-7.6)    | 9.2 (8.7-9.6)    |
| East                  | 1363 | 6.4 (6.1-6.8)   | 8.7 (8.3-9.1)    | 1518 | 8.3 (7.9-8.7)    | 8.3 (7.9-8.7)    |

---

\*age-standardised prevalence according to total population of CHARLS; †crude prevalence

**Table S2. Sex-specific unadjusted and adjusted odds ratios (95% CIs) for prevalence of different components of diabetes according to education with comparison to the illiterate group (n=10100)**

| Diabetes                         | Education (ref: illiterate) |         |                   |         |                  |         |                       |         |
|----------------------------------|-----------------------------|---------|-------------------|---------|------------------|---------|-----------------------|---------|
|                                  | Literate                    | p value | Elementary school | p value | Middle school    | p value | High school and above | p value |
| Men (n=4791)                     | 926                         |         | 1291              |         | 1243             |         | 673                   |         |
| Self-reported diabetes (n=252)   | 53                          |         | 66                |         | 56               |         | 59                    |         |
| Model 1                          | 2.16 (1.28-3.82)            | 0.006   | 1.92 (1.15-3.35)  | 0.02    | 1.68 (1.00-2.96) | 0.06    | 3.42 (2.03-6.02)      | <0.0001 |
| Model 2                          | 2.07 (1.22-3.69)            | 0.01    | 1.82 (1.08-3.22)  | 0.03    | 1.49 (0.86-2.72) | 0.17    | 2.41 (1.36-4.46)      | 0.004   |
| Screen-detected diabetes (n=484) | 101                         |         | 113               |         | 136              |         | 69                    |         |
| Model 1                          | 1.12 (0.81-1.56)            | 0.51    | 0.88 (0.64-1.21)  | 0.42    | 1.12 (0.82-1.54) | 0.47    | 1.04 (0.73-1.49)      | 0.82    |
| Model 2                          | 1.18 (0.85-1.65)            | 0.33    | 0.95 (0.68-1.32)  | 0.75    | 1.28 (0.91-1.81) | 0.15    | 1.18 (0.79-1.75)      | 0.42    |
| Total diabetes (n=736)           | 154                         |         | 179               |         | 192              |         | 128                   |         |
| Model 1                          | 1.38 (1.04-1.85)            | 0.03    | 1.12 (0.85-1.48)  | 0.44    | 1.27 (0.96-1.68) | 0.10    | 1.63 (1.21-2.20)      | 0.001   |
| Model 2                          | 1.42 (1.06-1.90)            | 0.02    | 1.16 (0.87-1.55)  | 0.32    | 1.33 (0.99-1.80) | 0.06    | 1.53 (1.10-2.15)      | 0.01    |
| Women (n=5309)                   | 942                         |         | 932               |         | 791              |         | 388                   |         |
| Self-reported diabetes (n=353)   | 63                          |         | 68                |         | 57               |         | 28                    |         |
| Model 1                          | 1.11 (0.81-1.50)            | 0.51    | 1.22 (0.90-1.64)  | 0.20    | 1.20 (0.87-1.65) | 0.26    | 1.20 (0.77-1.81)      | 0.39    |

|                                  |                  |      |                  |      |                  |      |                  |      |
|----------------------------------|------------------|------|------------------|------|------------------|------|------------------|------|
| Model 2                          | 1.10 (0.80-1.51) | 0.54 | 1.17 (0.85-1.60) | 0.34 | 1.01 (0.69-1.45) | 0.97 | 0.84 (0.51-1.36) | 0.49 |
| Screen-detected diabetes (n=503) | 94               |      | 89               |      | 62               |      | 33               |      |
| Model 1                          | 1.00 (0.77-1.29) | 0.99 | 0.95 (0.73-1.23) | 0.71 | 0.77 (0.57-1.02) | 0.08 | 0.84 (0.56-1.21) | 0.37 |
| Model 2                          | 1.09 (0.83-1.40) | 0.54 | 1.04 (0.79-1.36) | 0.77 | 0.92 (0.66-1.28) | 0.64 | 1.00 (0.64-1.54) | 0.98 |
| Total diabetes (n=856)           | 157              |      | 157              |      | 119              |      | 61               |      |
| Model 1                          | 1.05 (0.85-1.28) | 0.66 | 1.06 (0.86-1.30) | 0.58 | 0.93 (0.74-1.16) | 0.51 | 0.98 (0.72-1.30) | 0.87 |
| Model 2                          | 1.10 (0.89-1.36) | 0.36 | 1.10 (0.89-1.36) | 0.38 | 0.96 (0.74-1.24) | 0.75 | 0.91 (0.64-1.28) | 0.59 |

Model 1: crude odds ratio; Model 2: adjusted for age, education/AHLE, residence and geographical area

**Table S3. Sex-specific unadjusted and adjusted odds ratios (95% CIs) for prevalence of different components of diabetes according to annual household living expenditure with comparison to the lowest quartile (n=10100)**

| Diabetes                         | Annual household living expenditure (ref: Q1) |         |                  |         |                  |         |
|----------------------------------|-----------------------------------------------|---------|------------------|---------|------------------|---------|
|                                  | Q2                                            | p value | Q3               | p value | Q4               | p value |
| Men (n=4791)                     | 1201                                          |         | 1204             |         | 1207             |         |
| Self-reported diabetes (n=252)   | 54                                            |         | 77               |         | 82               |         |
| Model 1                          | 1.38 (0.91-2.11)                              | 0.14    | 2.00 (1.36-2.99) | 0.0005  | 2.13 (1.45-3.18) | 0.0001  |
| Model 2                          | 1.36 (0.89-2.09)                              | 0.15    | 1.90 (1.28-2.86) | 0.002   | 1.87 (1.26-2.84) | 0.002   |
| Screen-detected diabetes (n=484) | 110                                           |         | 132              |         | 119              |         |
| Model 1                          | 0.87 (0.66-1.13)                              | 0.30    | 1.06 (0.82-1.37) | 0.68    | 0.94 (0.72-1.23) | 0.64    |
| Model 2                          | 0.86 (0.66-1.14)                              | 0.30    | 1.05 (0.81-1.37) | 0.72    | 0.95 (0.72-1.25) | 0.69    |
| Total diabetes (n=736)           | 164                                           |         | 209              |         | 201              |         |
| Model 1                          | 0.99 (0.79-1.25)                              | 0.95    | 1.32 (1.06-1.65) | 0.02    | 1.25 (1.00-1.57) | 0.05    |
| Model 2                          | 0.99 (0.78-1.25)                              | 0.93    | 1.29 (1.03-1.62) | 0.03    | 1.20 (0.95-1.52) | 0.13    |
| Women (n=5309)                   | 1352                                          |         | 1324             |         | 1333             |         |
| Self-reported diabetes (n=353)   | 94                                            |         | 102              |         | 107              |         |

|                                  |                  |         |                  |         |                  |         |
|----------------------------------|------------------|---------|------------------|---------|------------------|---------|
| Model 1                          | 1.87 (1.32-2.67) | <0.0001 | 2.09 (1.48-2.97) | <0.0001 | 2.18 (1.55-3.10) | <0.0001 |
| Model 2                          | 1.96 (1.38-2.82) | 0.0002  | 2.28 (1.61-3.30) | <0.0001 | 2.31 (1.62-3.34) | <0.0001 |
| Screen-detected diabetes (n=503) | 120              |         | 122              |         | 116              |         |
| Model 1                          | 0.78 (0.60-1.00) | 0.05    | 0.81 (0.63-1.04) | 0.1     | 0.76 (0.59-0.98) | 0.04    |
| Model 2                          | 0.81 (0.63-1.05) | 0.12    | 0.86 (0.66-1.11) | 0.25    | 0.82 (0.63-1.07) | 0.14    |
| Total diabetes (n=856)           | 214              |         | 224              |         | 223              |         |
| Model 1                          | 1.07 (0.86-1.32) | 0.56    | 1.15 (0.94-1.42) | 0.18    | 1.14 (0.92-1.40) | 0.23    |
| Model 2                          | 1.12 (0.91-1.39) | 0.29    | 1.25 (1.01-1.55) | 0.04    | 1.22 (0.98-1.52) | 0.07    |

Model 1: crude odds ratio; Model 2: adjusted for age, education/AHLE, residence and geographical area

**Table S4. Sex-specific unadjusted and adjusted odds ratios (95% CIs) for self-reported diabetes according to education in the CHARLS population regardless of availability of blood sample with comparison to illiterate group (n=15181)**

| Diabetes                     | Education (ref: illiterate) |         |                   |         |                  |         |                       |         |
|------------------------------|-----------------------------|---------|-------------------|---------|------------------|---------|-----------------------|---------|
|                              | Literate                    | p value | Elementary school | p value | Middle school    | p value | High school and above | p value |
| Men (7430)                   | 1347                        |         | 1953              |         | 1958             |         | 1221                  |         |
| Self-reported diabetes (389) | 70                          |         | 103               |         | 84               |         | 101                   |         |
| Model 1                      | 1.63 (1.07-2.54)            | 0.03    | 1.65 (1.11-2.53)  | 0.02    | 1.33 (0.88-2.05) | 0.18    | 2.68 (1.79-4.10)      | <0.0001 |
| Model 2                      | 1.65 (1.07-2.59)            | 0.03    | 1.65 (1.09-2.55)  | 0.02    | 1.28 (0.83-2.03) | 0.28    | 1.89 (1.21-3.03)      | 0.007   |
| Women (7751)                 | 1367                        |         | 1325              |         | 1178             |         | 690                   |         |
| Self-reported diabetes (490) | 88                          |         | 93                |         | 88               |         | 46                    |         |
| Model 1                      | 1.19 (0.91-1.54)            | 0.21    | 1.30 (1.00-1.68)  | 0.05    | 1.39 (1.06-1.81) | 0.01    | 1.23 (0.87-1.71)      | 0.23    |
| Model 2                      | 1.20 (0.91-1.58)            | 0.19    | 1.30 (0.98-1.70)  | 0.07    | 1.21 (0.89-1.65) | 0.22    | 0.81 (0.54-1.20)      | 0.30    |

Model 1: crude odds ratio; Model 2: adjusted for age, education/AHLE, residence and geographical area

**Table S5. Sex-specific unadjusted and adjusted odds ratios (95% CIs) for self-reported diabetes according to annual household living expenditure in the CHARLS population regardless of availability of blood sample with comparison to the lowest quartile (n=15181)**

| Self-reported diabetes       | Annual household living expenditure (ref: Q1) |         |                  |         |                  |         |
|------------------------------|-----------------------------------------------|---------|------------------|---------|------------------|---------|
|                              | Q2                                            | p value | Q3               | p value | Q4               | p value |
| Men (7430)                   | 1861                                          |         | 1886             |         | 1864             |         |
| Self-reported diabetes (389) | 79                                            |         | 120              |         | 135              |         |
| Model 1                      | 1.42 (1.00-2.03)                              | 0.05    | 2.18 (1.58-3.04) | <0.0001 | 2.50 (1.83-3.48) | <0.0001 |
| Model 2                      | 1.42 (1.00-2.03)                              | 0.05    | 2.08 (1.50-2.92) | <0.0001 | 2.29 (1.65-3.22) | <0.0001 |
| Women (7751)                 | 1967                                          |         | 1927             |         | 1912             |         |
| Self-reported diabetes (490) | 122                                           |         | 147              |         | 152              |         |
| Model 1                      | 1.80 (1.33-2.44)                              | 0.0001  | 2.25 (1.68-3.03) | <0.0001 | 2.35 (1.76-3.16) | <0.0001 |
| Model 2                      | 1.90 (1.41-2.59)                              | <0.0001 | 2.38 (1.77-3.22) | <0.0001 | 2.47 (1.83-3.36) | <0.0001 |

Model 1: crude odds ratio; Model 2: adjusted for age, education/AHLE, residence and geographical area

**Table S6. Characteristics of participants included and excluded in the primary analysis**

| Characteristics        | Participants included<br>(n=10100) | Participants excluded<br>(n=7608) | P value |
|------------------------|------------------------------------|-----------------------------------|---------|
| Age (years)            |                                    |                                   | <0.0001 |
| 45-54                  | 3416 (33.8)                        | 3035 (40.0)                       |         |
| 55-64                  | 3893 (38.5)                        | 2553 (33.7)                       |         |
| 65-74                  | 1968 (19.5)                        | 1260 (16.6)                       |         |
| ≥75                    | 823 (8.1)                          | 734 (9.7)                         |         |
| Mean (SD)              | 59.4 (9.6)                         | 58.5 (10.9)                       | <0.0001 |
| Sex                    |                                    |                                   |         |
| Men                    | 4791 (47.4)                        | 3680 (48.5)                       | 0.18    |
| Self-reported diabetes |                                    |                                   |         |
| Yes                    | 605 (6.0)                          | 388 (5.3)                         | 0.06    |
| Education              |                                    |                                   | <0.0001 |
| Illiterate             | 2914 (28.9)                        | 1889 (25.0)                       |         |
| Literate               | 1868 (18.5)                        | 1272 (16.8)                       |         |
| Elementary school      | 2223 (22.0)                        | 1589 (21.0)                       |         |
| Middle school          | 2034 (20.1)                        | 1618 (21.4)                       |         |
| High school and above  | 1061 (10.5)                        | 1185 (15.7)                       |         |
| AHLE                   |                                    |                                   | 0.94    |
| Q1                     | 2479 (24.5)                        | 1391 (24.8)                       |         |
| Q2                     | 2553 (25.3)                        | 1395 (24.9)                       |         |
| Q3                     | 2528 (25.0)                        | 1414 (25.2)                       |         |
| Q4                     | 2540 (25.1)                        | 1400 (25.0)                       |         |
| Residence              |                                    |                                   | <0.0001 |
| Rural                  | 6513 (64.5)                        | 4024 (52.9)                       |         |
| Migrants               | 2008 (19.9)                        | 1591 (20.9)                       |         |
| Urban                  | 1579 (15.6)                        | 1990 (26.2)                       |         |
| Geographical area      |                                    |                                   | <0.0001 |
| West                   | 3453 (34.2)                        | 2310 (30.4)                       |         |
| Central and northeast  | 3766 (37.3)                        | 2565 (33.7)                       |         |
| East                   | 2881 (28.5)                        | 2730 (35.9)                       |         |

Values are N (%); missing data for participants excluded in the analysis were 27, 15, 299, 55, 2008, 3, and 3 for age, sex, self-reported diabetes, education, AHLE, residence, and geographical area, respectively.
